# Supplementary material
Source: Springer Nature journal article supplement (https://www.springermedizin.de/resource/supplementary/13058_2004_1029_MOESM1_ESM.pdf/9698174)

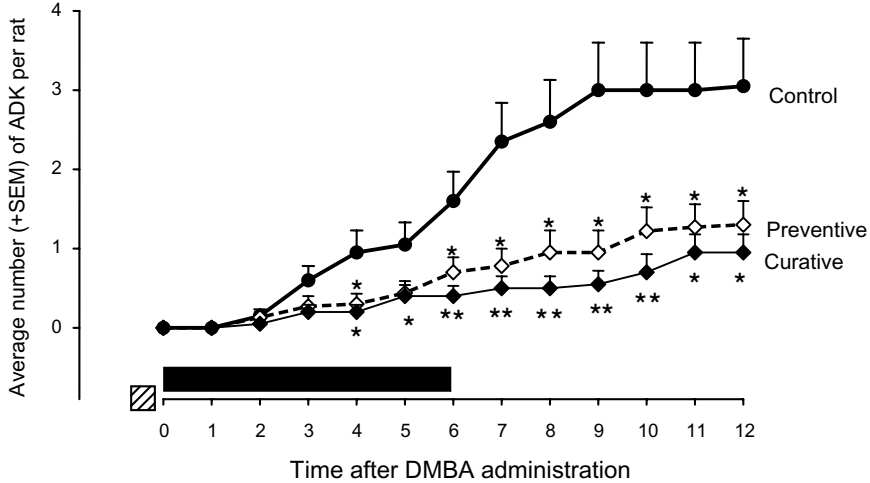

Supplement: MOESM1 [file 9698174]
